# Supplementary material for: Effects of Antibiotics on the Intestinal Microbiota of Mice
Source: Antibiotics (Basel). 2020 Apr 17;9(4):191. doi: 10.3390/antibiotics9040191 (PMC7235770; doi:10.3390/antibiotics9040191)
Supplement: Supplementary file 1 [file antibiotics-09-00191-s001.xlsx]

## Sheet: Ark1
Control	Bacteroidetes	Proteobacteria	Firmicutes	Bacteroidetes	Proteobacteria	Firmicutes	Bacteroidetes	Proteobacteria
Number of values	5	5	5	5	5	5	5	5
Minimum	524447	52776	66,00	55276	2,000	10994	236824	1,000
25% Percentile	528209	78034	225,0	58274	4,000	11174	331368	803,5
Median	532953	115524	9919	131767	10,00	71235	438651	3901
75% Percentile	605323	307264	50977	513832	3198	105066	619323	247371
Maximum	616625	342961	62758	550332	6362	109122	653977	409650
Mean	560003	177224	22464	255196	1283	60743	468006	100050
Std. Deviation	42264	123622	27614	239405	2839	47398	161458	176792
Std. Error	18901	55285	12349	107065	1270	21197	72206	79064
Lower 95% CI of mean	507525	23726	-11823	-42066	-2243	1890	267529	-119467
Upper 95% CI of mean	612481	330722	56752	552457	4808	119596	668484	319567
Sum	2,800e+006	886119	112322	1,276e+006	6414	303714	2,340e+006	500250
Cefuroxime	Bacteroidetes	Proteobacteria	Firmicutes	Bacteroidetes	Proteobacteria	Firmicutes	Bacteroidetes	Proteobacteria
Number of values	5	5	5	5	5	5	5	5
Minimum	329693	1,000	12163	140161	2,000	12804	307974	2,000
25% Percentile	355431	7110	15439	274958	1054	13146	331233	2,500
Median	443637	39409	39175	440644	7705	52424	475977	2671
75% Percentile	590911	92128	195501	562868	128203	73627	566761	24861
Maximum	654597	122569	332713	564745	165082	83304	595646	26840
Mean	467264	47577	92211	423259	53244	45194	454393	10479
Std. Deviation	128048	48130	135660	172929	73283	31269	121250	13247
Std. Error	57265	21524	60669	77336	32773	13984	54225	5924
Lower 95% CI of mean	308271	-12185	-76234	208539	-37749	6369	303840	-5969
Upper 95% CI of mean	626258	107338	260655	637979	144237	84019	604945	26928
Sum	2,336e+006	237884	461054	2,116e+006	266219	225969	2,272e+006	52397
Cefotaxime	Bacteroidetes	Proteobacteria	Firmicutes	Bacteroidetes	Proteobacteria	Firmicutes	Bacteroidetes	Proteobacteria
Number of values	5	5	5	5	5	5	5	5
Minimum	203710	0,0	32661	475453	18620	13039	324706	6374
25% Percentile	219776	2061	38520	475577	23788	28233	447216	14077
Median	275207	22232	46192	490240	43266	44146	579118	78614
75% Percentile	422649	71739	52007	540111	231609	95639	604242	106310
Maximum	528136	85483	54635	547383	363064	127965	625480	110306
Mean	312011	33966	45449	504323	110812	58378	536407	63877
Std. Deviation	128084	36788	8140	33610	144488	42862	120267	47247
Std. Error	57281	16452	3640	15031	64617	19168	53785	21129
Lower 95% CI of mean	152973	-11712	35341	462591	-68595	5158	387074	5212
Upper 95% CI of mean	471049	79645	55556	546055	290218	111598	685739	122542
Sum	1,560e+006	169832	227244	2,522e+006	554059	291889	2,682e+006	319386
Clindamycin	Bacteroidetes	Proteobacteria	Firmicutes	Bacteroidetes	Proteobacteria	Firmicutes	Bacteroidetes	Proteobacteria
Number of values	5	5	5	5	5	5	5	5
Minimum	137692	1,000	714,0	0,0	1353	25364	304,0	0,0
25% Percentile	208033	1355	15090	0,5000	22743	56442	797,0	14821
Median	380359	7745	44337	6,000	116598	95872	1826	200301
75% Percentile	527675	73392	47745	894,0	233895	249606	44930	307125
Maximum	555740	124597	51127	1633	245740	311077	60378	351955
Mean	370355	31448	34001	359,0	125974	141593	18656	168838
Std. Deviation	168647	52771	20224	715,3	107111	111147	26361	150945
Std. Error	75421	23600	9045	319,9	47901	49706	11789	67505
Lower 95% CI of mean	160951	-34077	8889	-529,1	-7022	3586	-14075	-18586
Upper 95% CI of mean	579759	96972	59113	1247	258970	279601	51387	356263
Sum	1,852e+006	157238	170006	1795	629872	707967	93280	844192
Ciprofloxacin	Bacteroidetes	Proteobacteria	Firmicutes	Bacteroidetes	Proteobacteria	Firmicutes	Bacteroidetes	Proteobacteria
Number of values	5	5	5	5	5	5	5	5
Minimum	444709	20686	6329	146983	4,000	29290	348816	1,000
25% Percentile	450138	86675	7615	159838	44,50	31789	396005	1,000
Median	469572	206037	32946	320251	4852	43139	451498	1,000
75% Percentile	491754	327079	42705	381916	10997	61028	501158	1055
Maximum	512205	356143	49639	397723	16836	65136	545428	2107
Mean	470671	206709	26717	280752	5387	45754	449165	422,4
Std. Deviation	25636	130569	18570	114126	6865	15081	69709	941,7
Std. Error	11465	58392	8305	51039	3070	6744	31175	421,2
Lower 95% CI of mean	438840	44585	3660	139044	-3137	27029	362609	-746,9
Upper 95% CI of mean	502503	368833	49774	422459	13911	64479	535720	1592
Sum	2,353e+006	1,034e+006	133585	1,404e+006	26935	228772	2,246e+006	2112
Dicloxacillin	Bacteroidetes	Proteobacteria	Firmicutes	Bacteroidetes	Proteobacteria	Firmicutes	Bacteroidetes	Proteobacteria
Number of values	5	5	5	5	5	5	5	5
Minimum	323218	2,000	43585	107056	12,00	47647	141185	579,0
25% Percentile	326410	10093	48578	112540	1311	51416	209079	37775
Median	410066	49503	74417	124796	13873	57353	386781	98699
75% Percentile	465909	310817	97463	483053	260312	58212	518289	280044
Maximum	511396	509184	118439	527275	272948	58742	561371	393724
Mean	398941	138265	73300	263196	107424	55321	368303	146867
Std. Deviation	77093	211652	28815	203221	139950	4481	165052	150173
Std. Error	34477	94654	12886	90883	62587	2004	73814	67159
Lower 95% CI of mean	303217	-124537	37521	10863	-66348	49758	163363	-39598
Upper 95% CI of mean	494664	401066	109078	515529	281195	60885	573243	333333
Sum	1,995e+006	691323	366499	1,316e+006	537118	276607	1,842e+006	734336

## Sheet: Ark2
	Day 1			Day 3			Day 5
	Firmicutes	Bacteroidetes	Proteobacteria	Firmicutes	Bacteroidetes	Proteobacteria	Firmicutes	Bacteroidetes	Proteobacteria
Control1	77020.4	616625	103291	39195.1	477331	5.63	10994.2	425911	85092.1
Control2	68418.9	594020	342961	383.67	55276.5	6362.37	109122	653977	409650
Control3	40349.4	531971	52776.3	9919.09	131767	1.52	11352.7	236824	1.35
Control4	69497.9	532953	115524	65.82	61272.3	34.49	71234.7	584669	3900.51
Control5	56284.4	524447	271567	62758.1	550332	10.01	101010	438651	1605.53
Avg	62314.2	560003	177224	22464.4	255196	1282.8	60742.6	468007	100050
Cefuroxime1	98095.6	527225	0.85	58287.7	564745	91324.4	63949.8	537875	22881.4
Cefuroxime2	65170.1	381169	122569	332713	409754	165082	83303.7	475977	26840.2
Cefuroxime3	12495.8	329693	61687	12162.5	440644	1.92	12803.7	354492	2.34
Cefuroxime4	45148.2	443637	39409.4	18714.8	140161	2106.19	13486.6	307974	2.97
Cefuroxime5	71894.1	654597	14217.8	39174.6	560990	7705.36	52423.8	595646	2670.79
Avg	58560.8	467264	47576.7	92210.6	423259	53243.9	45193.5	454393	10479.6
Cefotaxime1	47742.1	528136	0.08	32661.3	475453	100154	13038.9	324706	6374.48
Cefotaxime2	11147.6	275207	22232	49378	490240	18620.1	63313.4	569725	110306
Cefotaxime3	23461.5	317161	57994.7	46192.4	475700	43266.2	127965	625480	21779.4
Cefotaxime4	6520.8	203710	4121.76	44377.7	547383	28955.3	43425.6	583004	102313
Cefotaxime5	13616.1	235842	85483.1	54634.9	532839	363064	44146.4	579118	78613.9
Avg	20497.6	312011	33966.3	45448.9	504323	110812	58377.8	536406	63877.3
Ciprofloxacin1	44222.4	455567	298015	32946.1	320251	5157.81	34287.8	456887	2106.73
Ciprofloxacin2	68093.2	469572	152664	8899.75	366109	85.19	65136.1	545428	0.97
Ciprofloxacin3	21247.8	471303	20685.8	49639.2	397723	16835.6	56919.5	451498	1.07
Ciprofloxacin4	40481	444709	206037	35771.2	146983	4851.58	43138.6	443194	2.01
Ciprofloxacin5	60738.4	512205	356143	6328.77	172692	4.09	29289.8	348816	1.32
Avg	46956.6	470671	206709	26717	280752	5386.86	45754.4	449164	422.42
Dicloxacillin1	22982.5	420421	20183.7	43585.4	527275	2609.79	57352.8	475206	579.3
Dicloxacillin2	41543.7	329602	49502.8	118439	118023	11.98	58741.7	386781	74971.1
Dicloxacillin3	38352.1	511396	509184	76486.6	107056	272948	47646.8	276972	98698.6
Dicloxacillin4	6391.94	323218	112450	74416.7	124796	247675	57681.2	141185	166363
Dicloxacillin5	63807.5	410066	2.08	53570.8	438830	13872.7	55183.7	561371	393724
Avg	34615.6	398941	138265	73299.8	263196	107423	55321.2	368303	146867
Clindamycin1	5000.1	278373	22187.3	51126.7	1633.21	245740	25363.7	1825.5	200301
Clindamycin2	42306.1	555740	7745.34	713.72	0.46	1352.75	311077	60378.5	351955
Clindamycin3	16317.5	380359	124597	44361.8	6.45	116598	188134	29482.1	262295
Clindamycin4	73998.2	137692	1.33	29466.1	0.65	44131.9	95871.5	303.65	29641.1
Clindamycin5	57636.4	499610	2708.44	44337.4	154.98	222049	87519.6	1289.76	0.06
Avg	39051.6	370355	31447.9	34001.2	359.15	125974	141593	18655.9	168838
	Ratio day 3/day 1			Ratio day 5/day 1			Ratio day 5/day 3
	Firmicutes	Bacteroidetes	Proteobacteria	Firmicutes	Bacteroidetes	Proteobacteria	Firmicutes	Bacteroidetes	Proteobacteria
Control1	0.508893	0.774103	5.45064e-05	0.142744	0.690713	0.823812	0.2805	0.892275	15114
Control2	0.00560766	0.0930549	0.0185513	1.5949	1.10093	1.19445	284.415	11.831	64.3863
Control3	0.24583	0.247696	2.88008e-05	0.281361	0.445182	2.55797e-05	1.14453	1.79729	0.888158
Control4	0.000947079	0.114968	0.000298553	1.02499	1.09704	0.0337637	1082.27	9.54214	113.091
Control5	1.11502	1.04936	3.68601e-05	1.79463	0.836407	0.00591209	1.60951	0.797067	160.393
Avg	0.360501	0.455704	0.00723833	0.974779	0.835721	0.564539	2.70395	1.83391	77.9931
Cefuroxime1	0.594193	1.07116	107440	0.651913	1.0202	26919.3	1.09714	0.952422	0.250551
Cefuroxime2	5.10531	1.07499	1.34685	1.27825	1.24873	0.218981	0.250377	1.16162	0.162588
Cefuroxime3	0.973332	1.33653	3.11249e-05	1.02464	1.07522	3.79334e-05	1.05272	0.804487	1.21875
Cefuroxime4	0.41452	0.315937	0.0534438	0.298718	0.694203	7.53627e-05	0.720637	2.19729	0.00141013
Cefuroxime5	0.544893	0.857001	0.54195	0.72918	0.909943	0.187848	1.33821	1.06178	0.346615
Avg	1.57461	0.905823	1.11912	0.771737	0.972454	0.220266	0.490112	1.07356	0.196822
Cefotaxime1	0.684119	0.900247	1.25192e+06	0.273111	0.614814	79681	0.399216	0.682939	0.0636469
Cefotaxime2	4.42945	1.78135	0.837536	5.67953	2.07017	4.96158	1.28222	1.16213	5.92402
Cefotaxime3	1.96886	1.49987	0.746038	5.45426	1.97212	0.375541	2.77026	1.31486	0.503381
Cefotaxime4	6.80557	2.68707	7.02499	6.65955	2.86193	24.8226	0.978545	1.06507	3.53347
Cefotaxime5	4.01252	2.25931	4.24721	3.24222	2.45554	0.919643	0.808026	1.08685	0.216529
Avg	2.21727	1.61636	3.26241	2.84803	1.71919	1.88061	1.28447	1.06362	0.576448
Ciprofloxacin1	0.74501	0.702973	0.0173072	0.77535	1.0029	0.00706921	1.04072	1.42665	0.408454
Ciprofloxacin2	0.1307	0.779666	0.000558024	0.956573	1.16154	6.35383e-06	7.31887	1.4898	0.0113863
Ciprofloxacin3	2.3362	0.843879	0.813874	2.67883	0.957978	5.17263e-05	1.14666	1.13521	6.35557e-05
Ciprofloxacin4	0.883655	0.330514	0.0235471	1.06565	0.996593	9.75553e-06	1.20596	3.01528	0.000414298
Ciprofloxacin5	0.104197	0.337154	1.14842e-05	0.482228	0.681008	3.70638e-06	4.62804	2.01987	0.322738
Avg	0.568973	0.596492	0.0260601	0.974397	0.954306	0.00204355	1.71256	1.59986	0.0784167
Dicloxacillin1	1.89646	1.25416	0.129302	2.49549	1.13031	0.0287014	1.31587	0.901249	0.221972
Dicloxacillin2	2.85096	0.358077	0.000242007	1.41397	1.17348	1.51448	0.495964	3.27717	6258.02
Dicloxacillin3	1.99433	0.209341	0.536049	1.24235	0.5416	0.193837	0.622943	2.58717	0.361603
Dicloxacillin4	11.6423	0.386106	2.20253	9.02406	0.436809	1.47943	0.775111	1.13132	0.671697
Dicloxacillin5	0.839569	1.07014	6669.58	0.864846	1.36898	189290	1.03011	1.27924	28.3811
Avg	2.11754	0.659737	0.776941	1.59816	0.923202	1.06222	0.754725	1.39935	1.36718
Clindamycin1	10.2251	0.00586698	11.0757	5.07264	0.00655775	9.0277	0.496095	1.11774	0.815094
Clindamycin2	0.0168704	8.27725e-07	0.174653	7.353	0.108645	45.4409	435.852	131258	260.178
Clindamycin3	2.71867	1.69576e-05	0.935803	11.5296	0.0775112	2.10515	4.2409	4570.87	2.24957
Clindamycin4	0.398201	4.72067e-06	33181.9	1.29559	0.00220528	22286.5	3.25362	467.154	0.671648
Clindamycin5	0.769261	0.000310202	81.9842	1.51848	0.00258153	2.2153e-05	1.97395	8.32211	2.7021e-07
Avg	0.870672	0.000969745	4.00581	3.62579	0.050373	5.36884	4.16436	51.9446	1.34026
